# Supplementary material
Source: HighWire-hosted journal article supplement (http://www.qdcxjkg.com/highwire/filestream/113559/field_highwire_adjunct_files/1/Supplementary_table_1_ERJ01018-2012.pdf)
Supplement: Supplementary_table_1_ERJ01018-2012.pdf [file Supplementary_table_1_ERJ01018-2012.pdf]

Supplementary table 1. Effects of respiratory viral infection on the risk of non-severe and severe lower respiratory infection (LRIs) among hospitalized children <5 years, Khanh Hoa Province, Vietnam, 2007-2010.

|       |          | No LRIs      | Non-severe LRIs | Severe LRIs | Total | Test for trend |
|-------|----------|--------------|-----------------|-------------|-------|----------------|
| HRV   | Positive | 371 (23.3)   | 77 (27.1)       | 33 (29.2)   | 481   | 0.0227         |
|       | Negative | 1,224 (76.7) | 207 (72.9)      | 80 (70.8)   | 1,511 |                |
|       |          | 1,595        | 284             | 113         | 1,992 |                |
|       |          | No LRIs      | Non-severe LRIs | Severe LRIs | Total | Test for trend |
| RSV   | Positive | 307 (19.2)   | 67 (23.6)       | 27 (23.9)   | 401   | 0.0208         |
|       | Negative | 1,288 (80.8) | 217 (76.4)      | 86 (76.1)   | 1,591 |                |
|       |          | 1,595        | 284             | 113         | 1,992 |                |
|       |          | No LRIs      | Non-severe LRIs | Severe LRIs | Total | Test for trend |
| Inf A | Positive | 203 (12.7)   | 31 (10.9)       | 5 (4.4)     | 239   | 0.0226         |
|       | Negative | 1,392 (87.3) | 253 (89.1)      | 108 (95.6)  | 1,753 |                |
|       |          | 1,595        | 284             | 113         | 1,992 |                |
|       |          | No LRIs      | Non-severe LRIs | Severe LRIs | Total | Test for trend |
| Adeno | Positive | 95 (6.0)     | 13 (4.6)        | 3 (2.7)     | 111   | 0.1            |
|       | Negative | 1,500 (94.0) | 271 (95.4)      | 110 (97.3)  | 1,881 |                |
|       |          | 1,595        | 284             | 113         | 1,992 |                |
|       |          | No LRIs      | Non-severe LRIs | Severe LRIs | Total | Test for trend |
| HMPV  | Positive | 30 (1.9)     | 10 (3.5)        | 4 (3.5)     | 44    | 0.0373         |
|       | Negative | 1,565 (98.1) | 274 (96.5)      | 109 (96.5)  | 1,948 |                |
|       |          | 1,595        | 284             | 113         | 1,992 |                |
